# Supplementary material for: Ceftolozane-Tazobactam Treatment of Hypervirulent Multidrug Resistant Pseudomonas aeruginosa Infections in Neutropenic Patients
Source: MDPI journal article supplement (doi:10.3390/microorganisms8122055), 2020-12-21
Supplement: s1 [file s1]

Supplementary

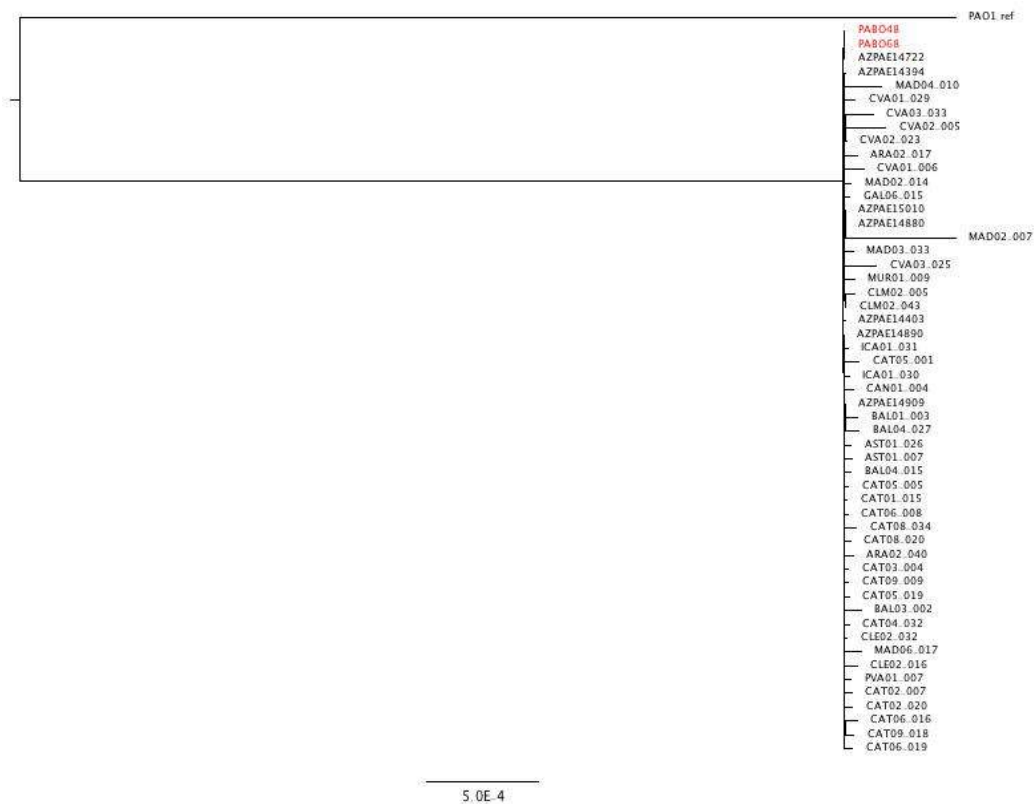

**Figure S1. Maximum likelihood phylogenetic tree based on the SNPs in the core genomes of ST175 *Pseudomonas aeruginosa* clinical strains.** Strains associated with transmission event described in this study are highlighted in red.

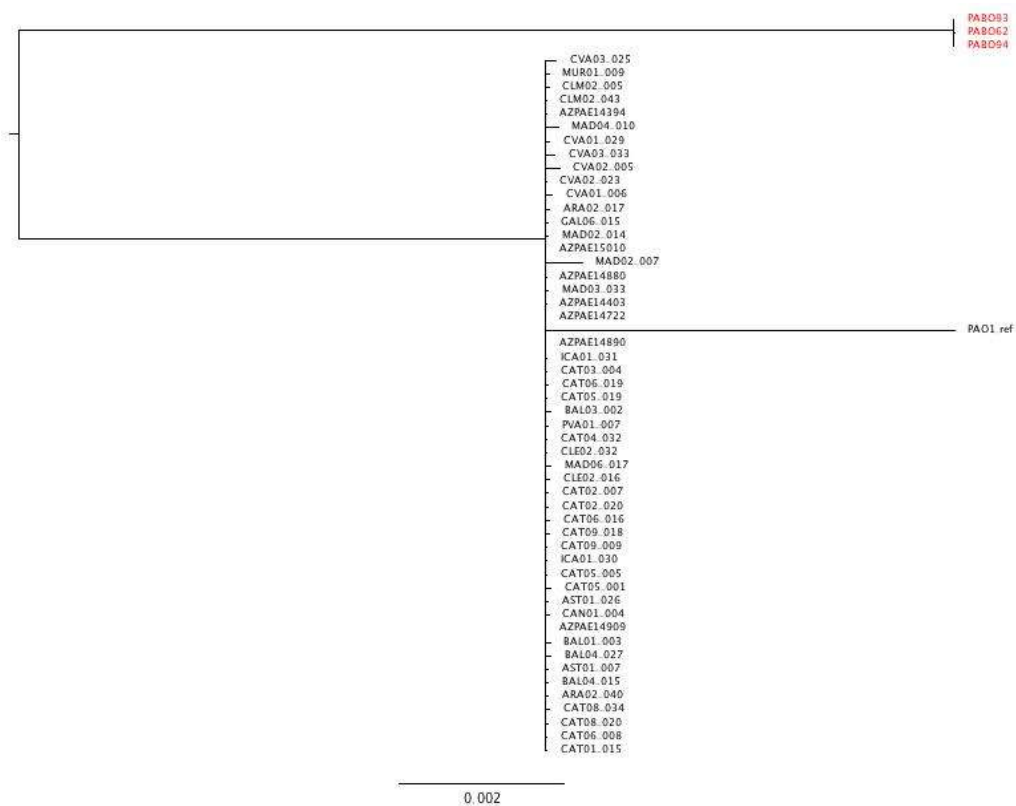

**Figure S2. Maximum likelihood phylogenetic tree based on the SNPs in the core genomes of ST235 *Pseudomonas aeruginosa* environmental strains.** Strains associated with transmission event described in this study are highlighted in red.
